# Supplementary material for: Integrated 5-hydroxymethylcytosine and fragmentation signatures as enhanced biomarkers in lung cancer
Source: PubMed Central journal article supplement (PMC8787948; doi:10.1186/s13148-022-01233-7), 2022-01-24

# SupFig1

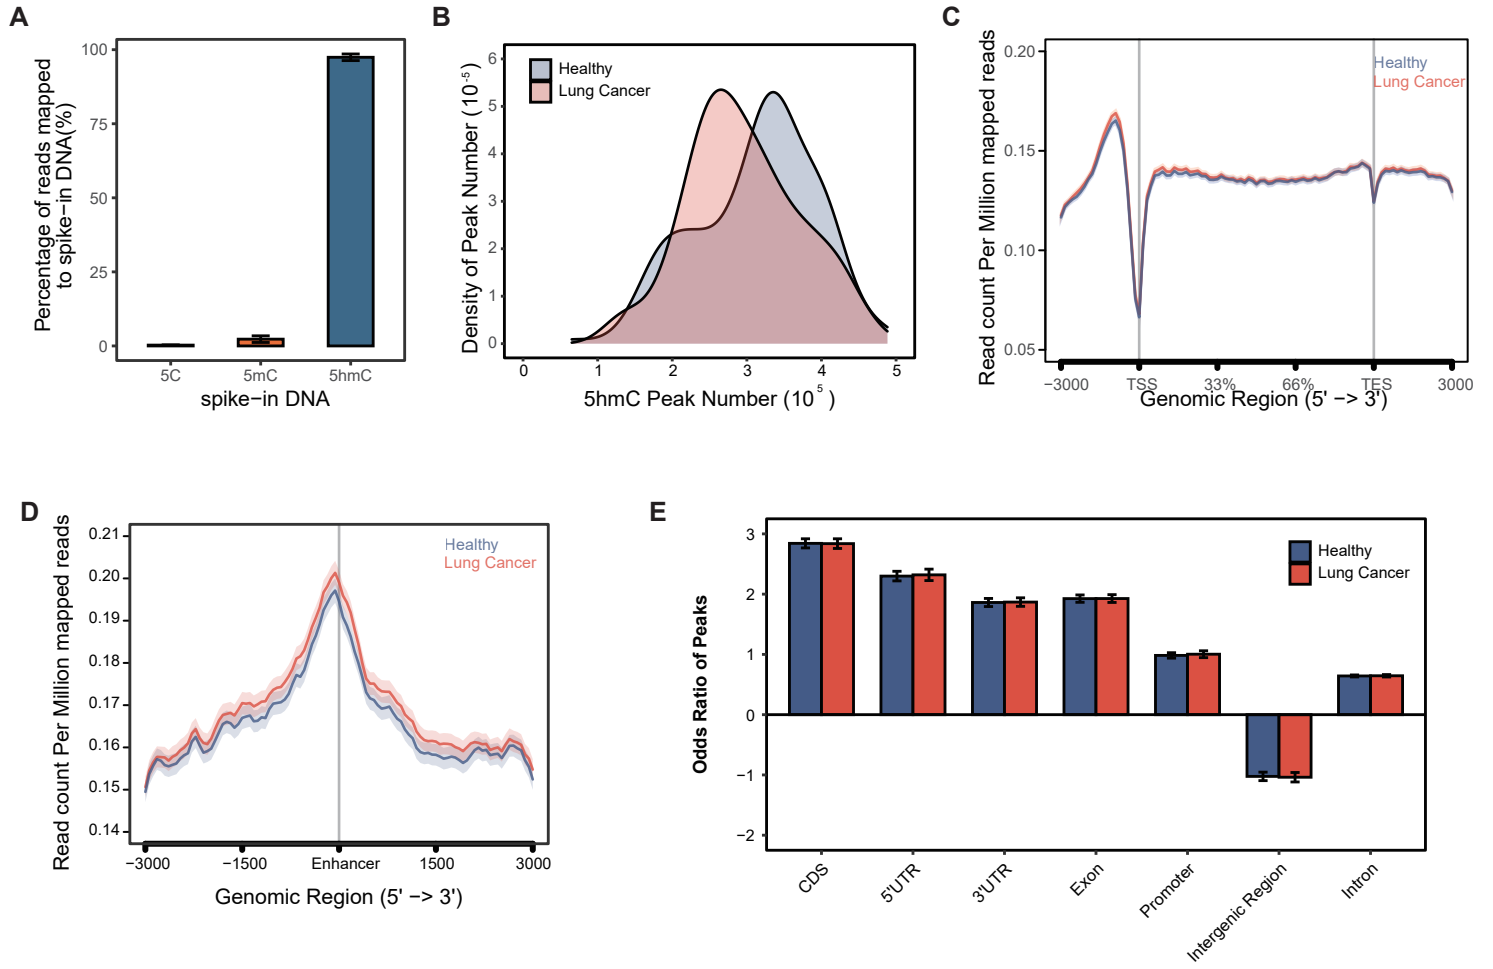

SupFig2

A

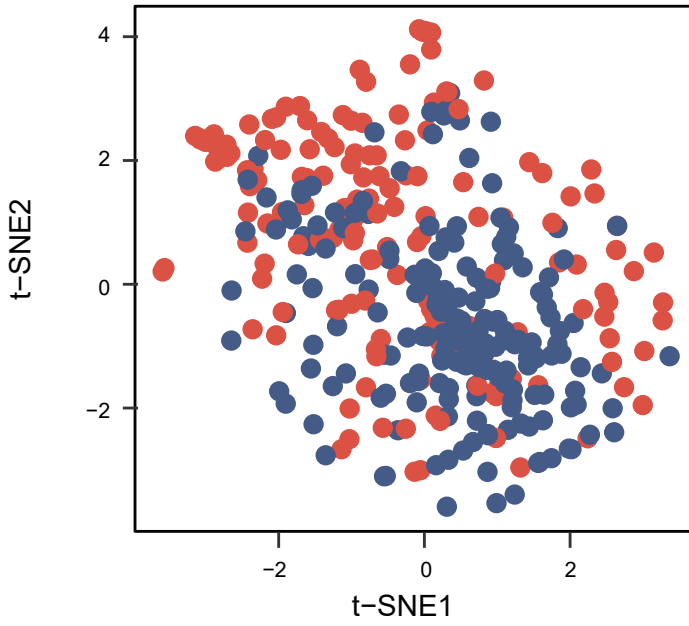

type

- healthy
- lung

batch

- 20190327
- 20190406
- 20190802
- 20190425
- 20190520
- 20190812
- 20190617
- 20190513
- 20190601
- 20190622
- 20190912
- 20201009
- 20190724
- 20190730
- 20210324

B

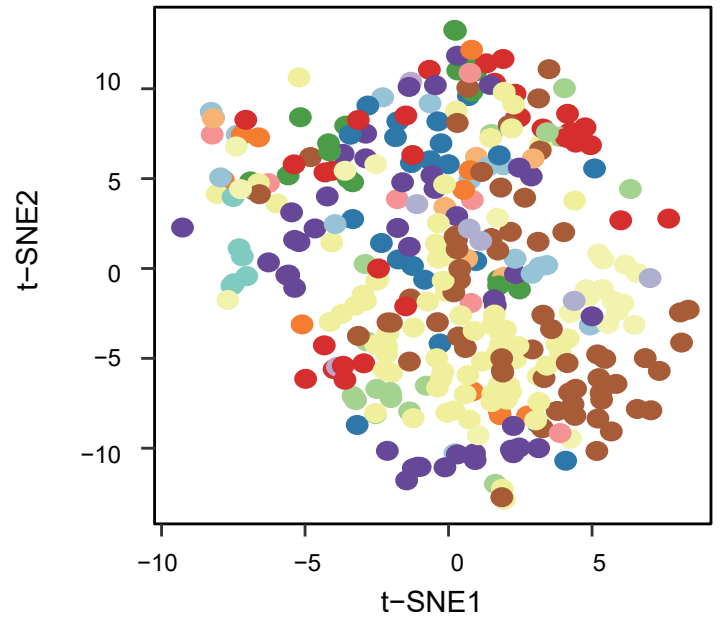

C

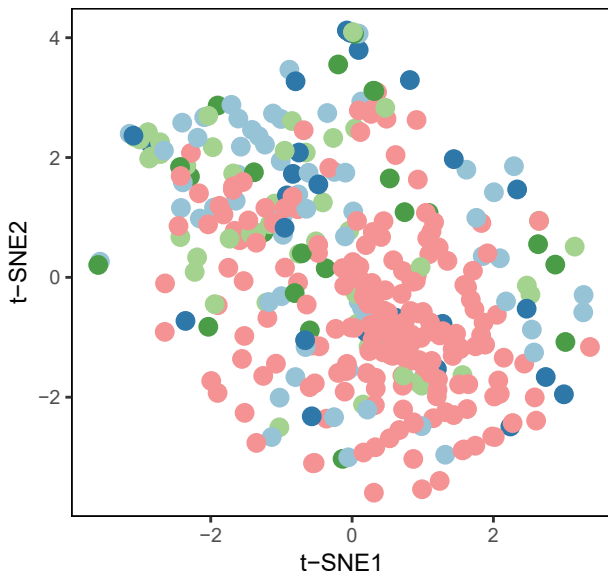

D

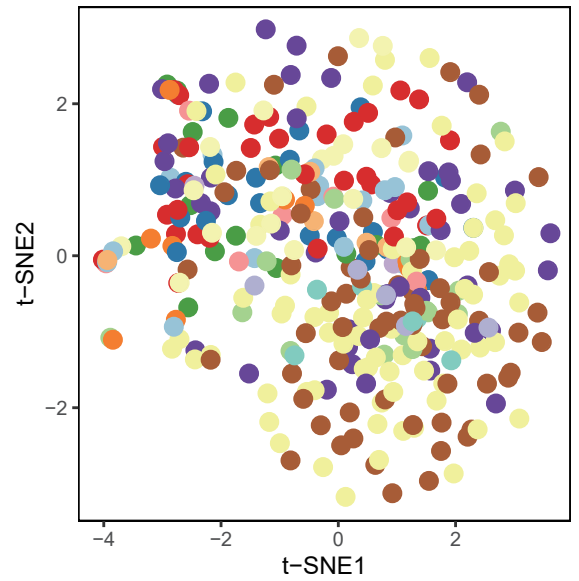

E

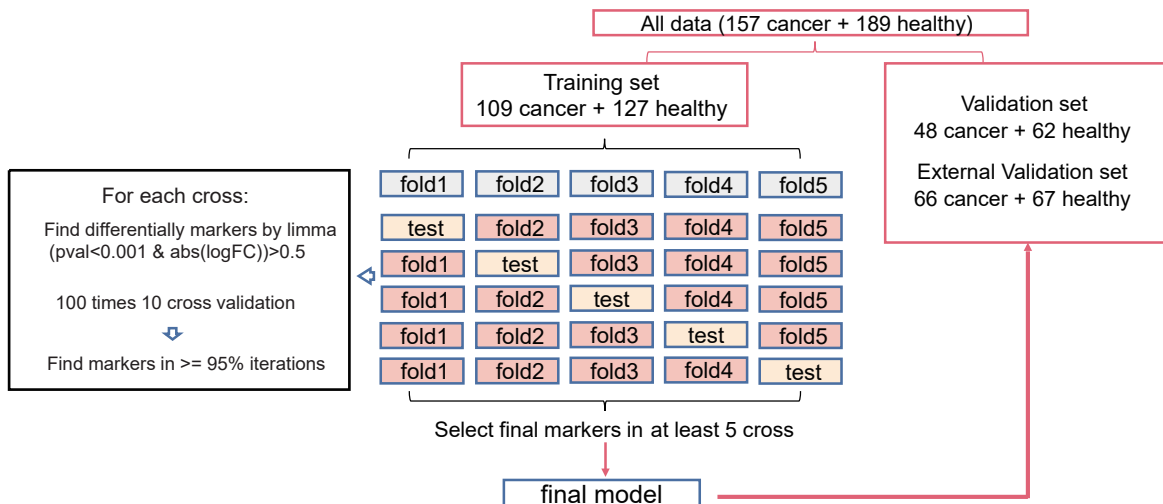

# SupFig3

**A**

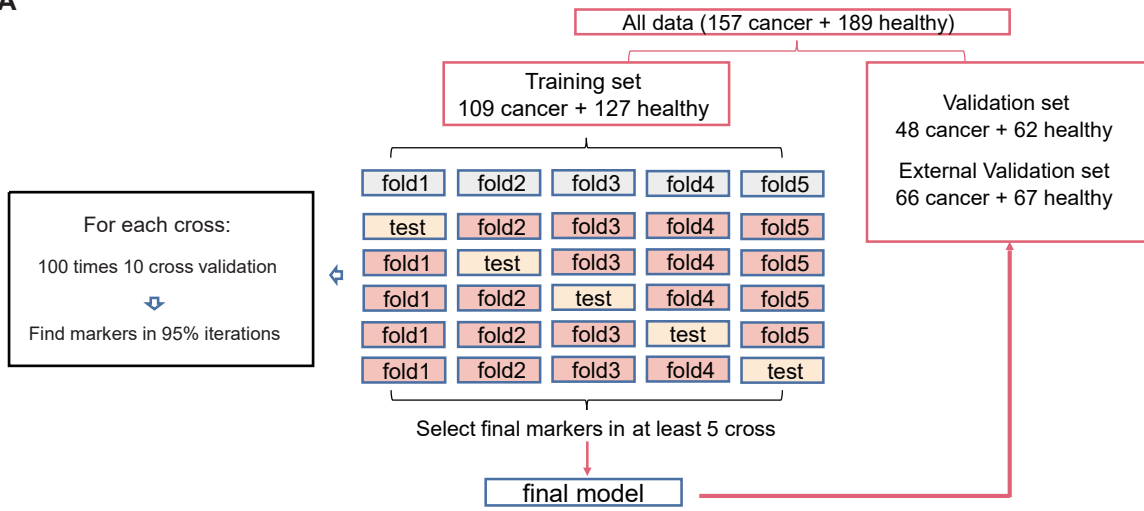

**B**

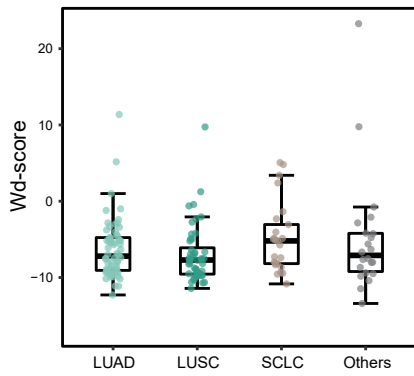

# SupFig4

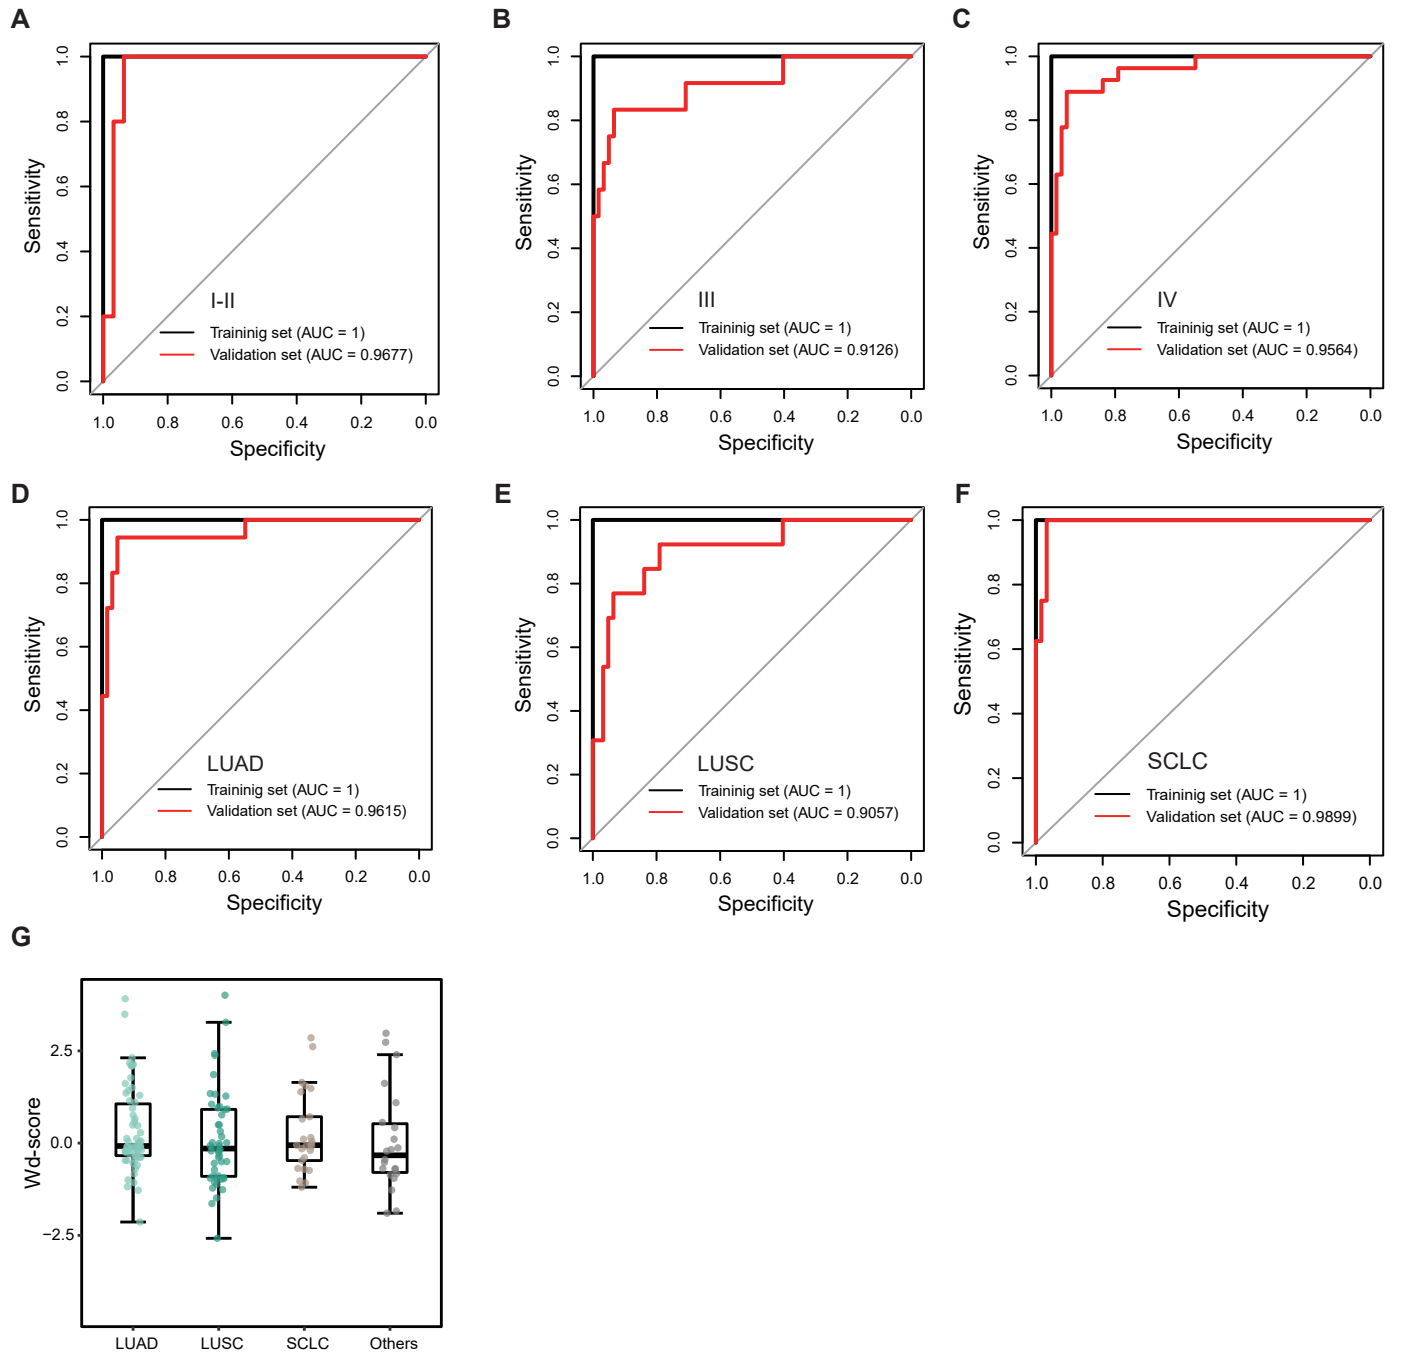

SupFig 5

A

Overall Survival

Disease Free Survival

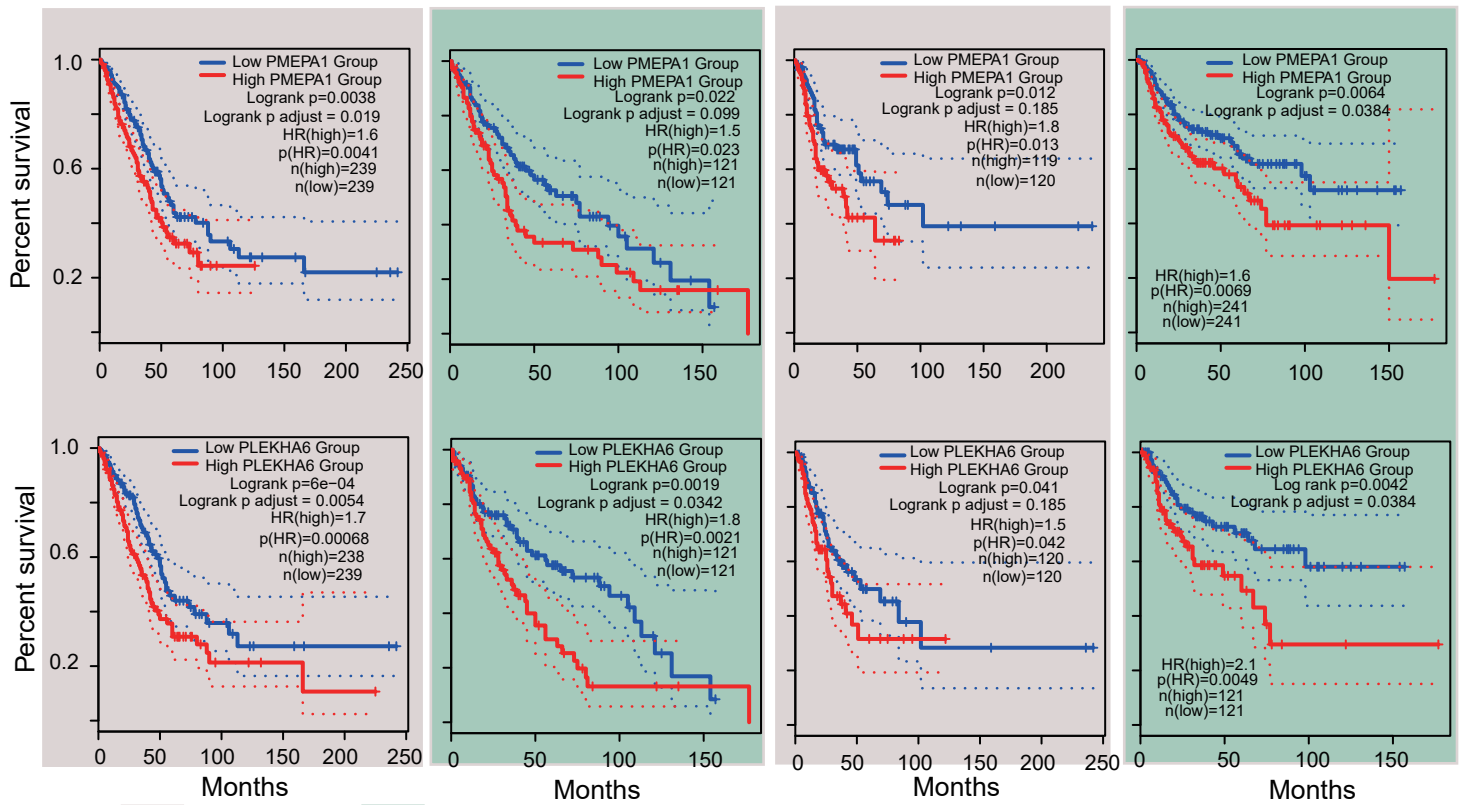

LUAD LUSC

C

Overall Survival (LUAD+LUSC)

Overall Survival (LUAD)

Overall Survival (LUSC)

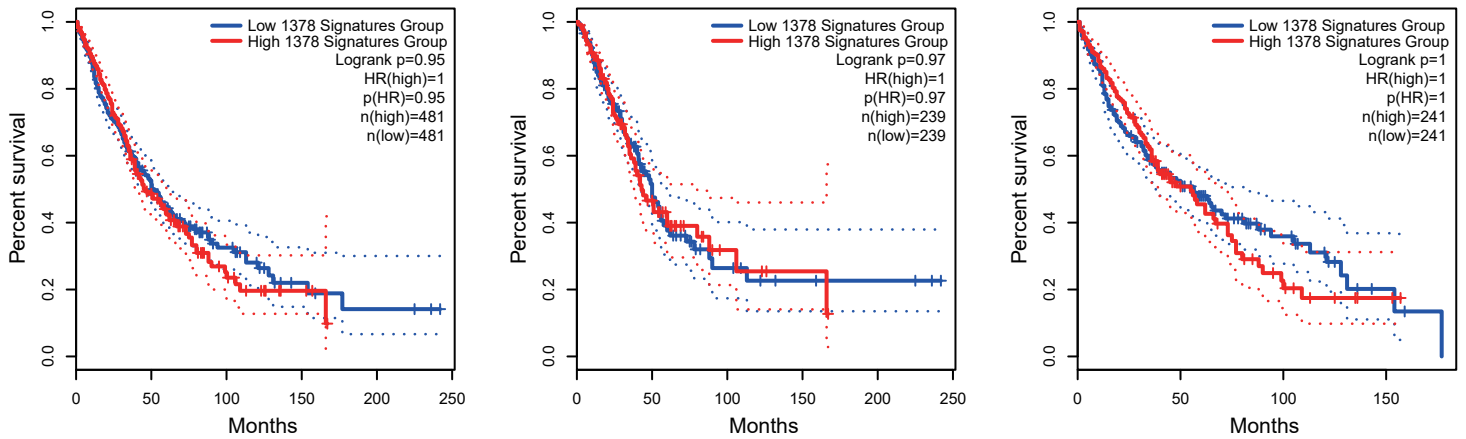

D

Disease Free Survival (LUAD+LUSC)

Disease Free Survival (LUAD)

Disease Free Survival (LUSC)

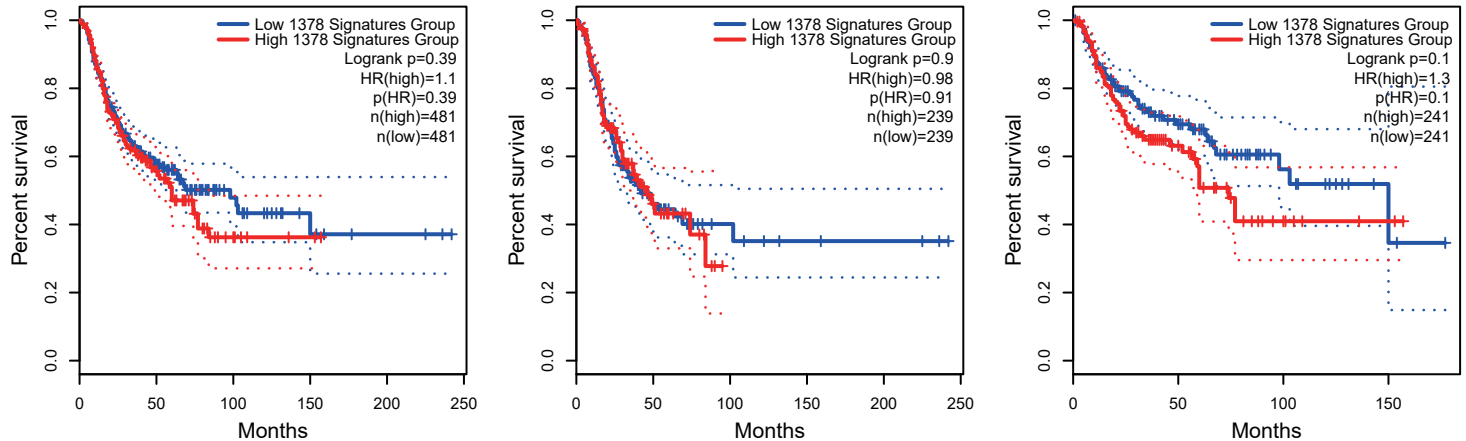

Supplement: 13148_2022_1233_MOESM1_ESM.pdf [file 13148_2022_1233_MOESM1_ESM.pdf]
